# Supplementary material for: Analysis of Aflibercept Expression in NHPs following Intravitreal Administration of ADVM-022, a Potential Gene Therapy for nAMD
Source: PubMed Central journal article supplement — Mol Ther Methods Clin Dev. 2020 Jun 12;18:345–53. doi: 10.1016/j.omtm.2020.06.007 (PMC7341454; doi:10.1016/j.omtm.2020.06.007), 2020-06-12
Supplement: mmc1.pdf [file mmc1.pdf]

**OMTM, Volume 18**

**Supplemental Information**

**Analysis of Aflibercept Expression in NHPs  
following Intravitreal Administration  
of ADVIM-022, a Potential Gene Therapy for nAMD**

**Szilárd Kiss, Ruslan Grishanin, Aivan Nguyen, Romeo Rosario, Judith S. Greengard, Julio Nieves, Claire M. Gelfman, and Mehdi Gasmi**

**SUPPLEMENTAL INFORMATION**

**Table S1.** Effect ADVN-022 dose on the intraocular aflibercept expression at Day 56 post-dose

| Treatment Group                      | Animal |    | Aflibercept levels |               |          |          |
|--------------------------------------|--------|----|--------------------|---------------|----------|----------|
|                                      |        |    | Vitreous humor     | Aqueous humor | Retina   | Choroid  |
| Group 2<br>2×10 <sup>11</sup> vg/eye | 1      | OD | 4.3 µg/mL          | 0.5 µg/mL     | 4.1 µg/g | 0.9 µg/g |
|                                      |        | OS | 5.3 µg/mL          | 0.7 µg/mL     | 5.5 µg/g | 0.7 µg/g |
|                                      | 2      | OD | 2.5 µg/mL          | 0.4 µg/mL     | 2.2 µg/g | 1.7 µg/g |
|                                      |        | OS | 2.4 µg/mL          | 0.3 µg/mL     | 2.2 µg/g | 0.3 µg/g |
| Group 3<br>6×10 <sup>11</sup> vg/eye | 3      | OD | 5.0 µg/mL          | 1.6 µg/mL     | 5.9 µg/g | 4.5 µg/g |
|                                      |        | OS | 6.0 µg/mL          | 0.8 µg/mL     | 6.4 µg/g | 0.7 µg/g |
|                                      | 4      | OD | 2.8 µg/mL          | 0.5 µg/mL     | 3.1 µg/g | 1.4 µg/g |
|                                      |        | OS | 3.4 µg/mL          | 0.8 µg/mL     | 3.0 µg/g | 1.0 µg/g |
| Group 4<br>2×10 <sup>12</sup> vg/eye | 5      | OD | 6.1 µg/mL          | 1.5 µg/mL     | 6.3 µg/g | 2.3 µg/g |
|                                      |        | OS | 4.1 µg/mL          | 1.3 µg/mL     | 6.0 µg/g | 2.0 µg/g |
|                                      | 6      | OD | 8.0 µg/mL          | 1.6 µg/mL     | 8.4 µg/g | 9.6 µg/g |
|                                      |        | OS | 9.0 µg/mL          | 2.5 µg/mL     | 8.6 µg/g | 3.9 µg/g |

*Supplemental figures*

*Animal A581, 2E11 vg/eye*

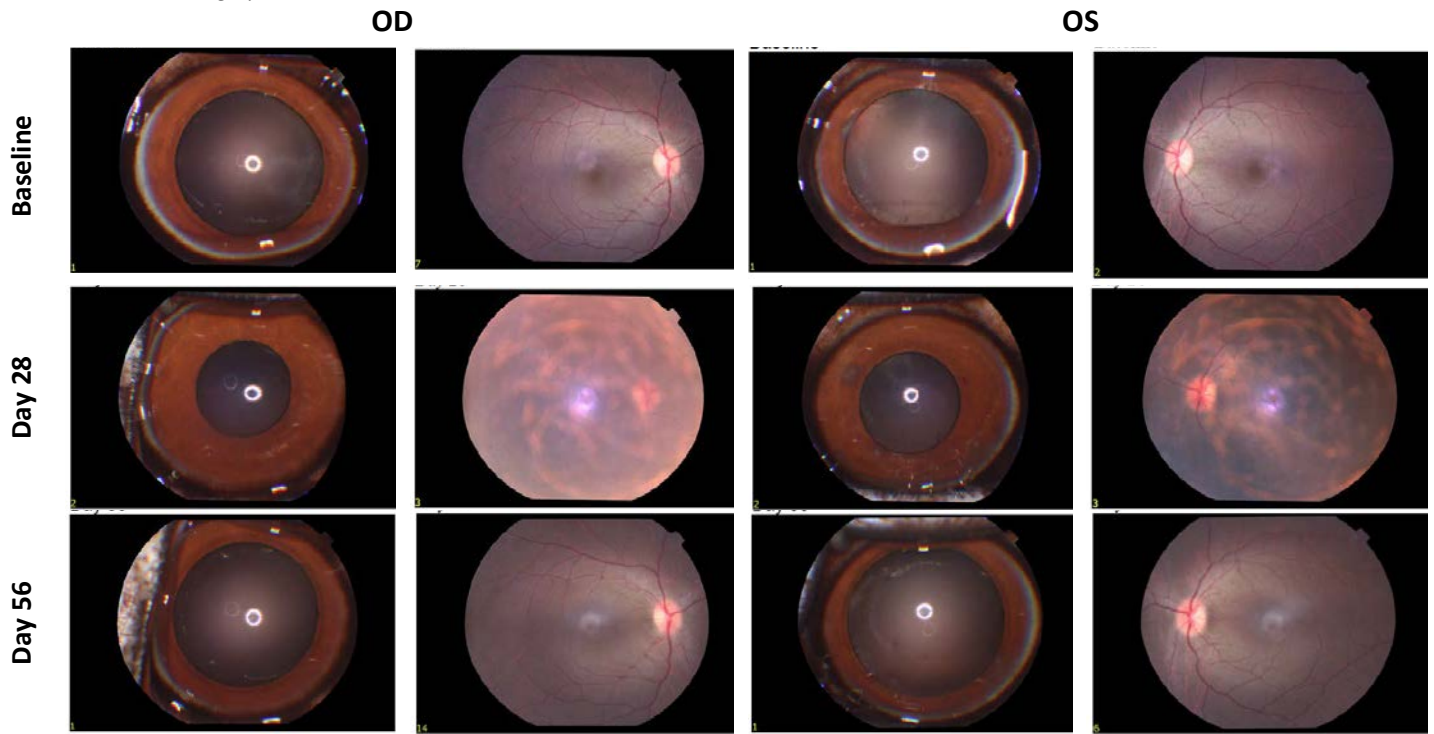

*Animal A633, 6E11 vg/eye*

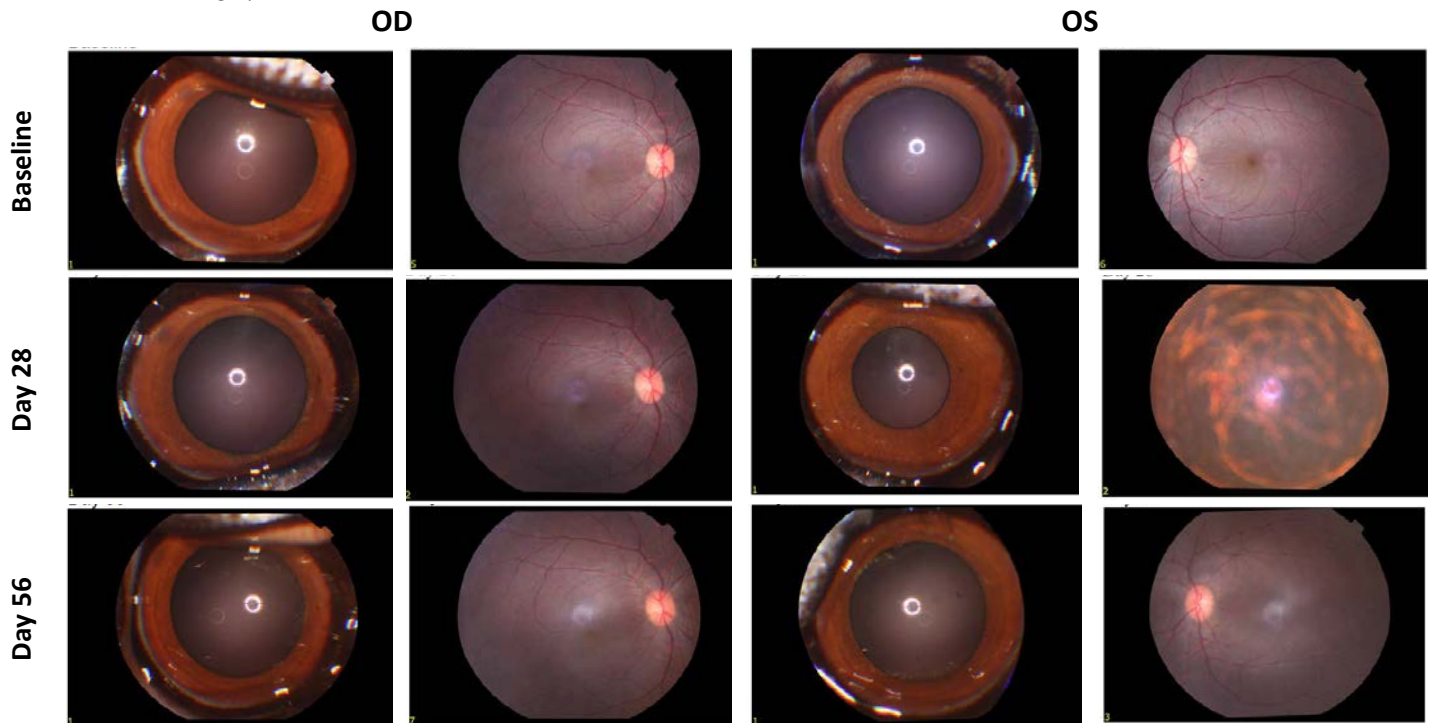

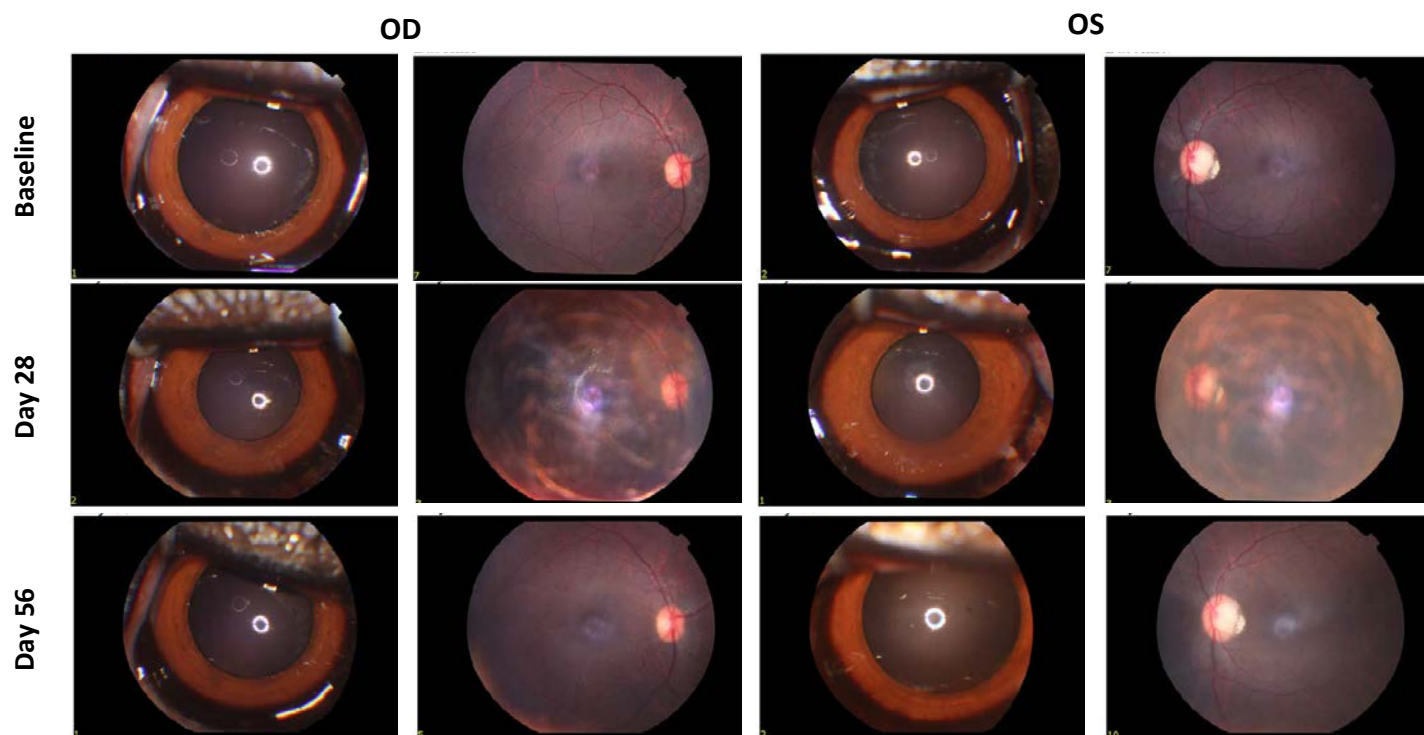

**Figure S1. Representative anterior segment and dilated fundus photographs of non-human primates receiving a single intravitreal injection of ADVN-022 at  $2 \times 10^{11}$ ,  $6 \times 10^{11}$  and  $2 \times 10^{12}$  vg/eye.** Images collected at baseline, Day 28 and Day 56 post-dose are shown. On day 28 following the injection, anterior chamber inflammation is noted (although not evident on the photographs); there is incomplete pupillary dilation in all six eyes as a result of the anterior inflammation. Fundus photographs at day 28 demonstrate a hazy view of the posterior segment structures (optic nerve, macula and vasculature) in 5 of 6 eyes. (The orange coloring in the photographs is an artifact as a result of the inflammation in the anterior and posterior segments) By day 56, inflammation has resolved in all eyes without treatment; the pupillary dilation returns to baseline and the views of the posterior segment structures is complete.

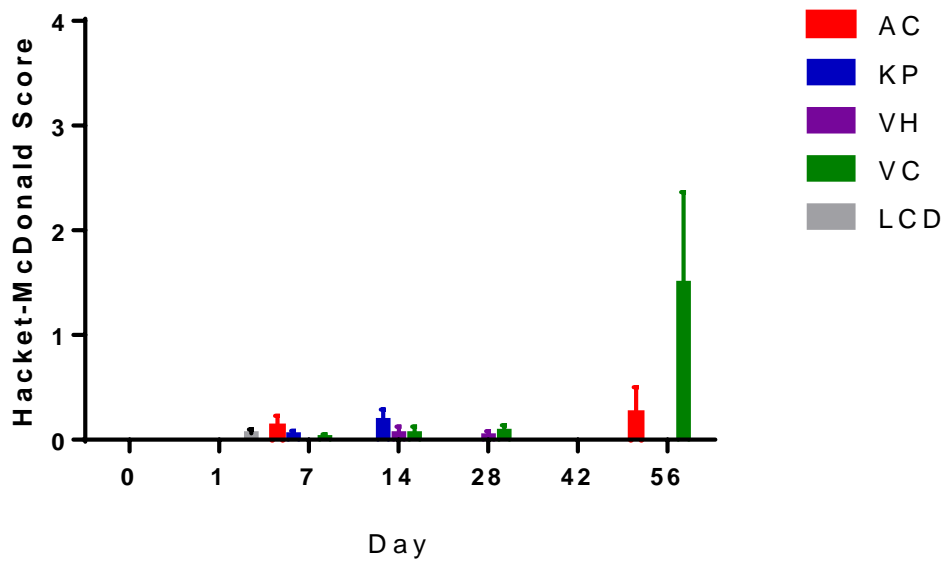

**Figure S2. Aflibercept IVT administration at 1.2 mg/eye results in sporadic inflammatory manifestations in the eye.** Aqueous cell (AC), keratic precipitate (KP), lens capsule deposit (LCD), vitreous cells (VC) and vitreous haze (VH) were parameters observed out of 21 parameters scored by slit-lamp examination (see Methods). Scores shown as Mean  $\pm$  SEM, n=24 (Baseline and Day 1), n=20 (Day 7), n=16 (Day 14), n=12 (Day 28), n=8 (Day 42), n=4 (Day 56).
